# Supplementary material
Source: publisher figshare collection journal article supplement (https://karger.figshare.com/articles/dataset/_/14672223)

**Supplementary Figure 2.** Complete response rate in the acute, delayed, and overall periods by age group.

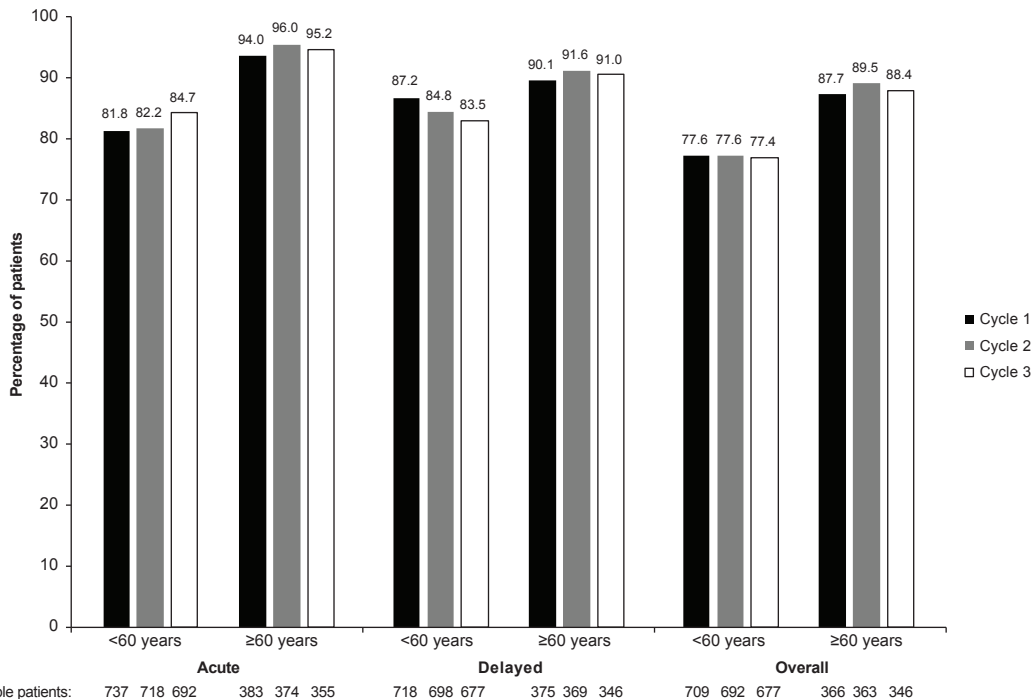

Supplement: Supplementary file 2 [file 1]
