# Supplementary material
Source: publisher figshare collection journal article supplement (https://karger.figshare.com/articles/dataset/_/14672223)
Supplement: Supplementary file 3 [file 1]

## Supplementary Figure 5. Perception of NEPA effectiveness by physicians and patients by age group.

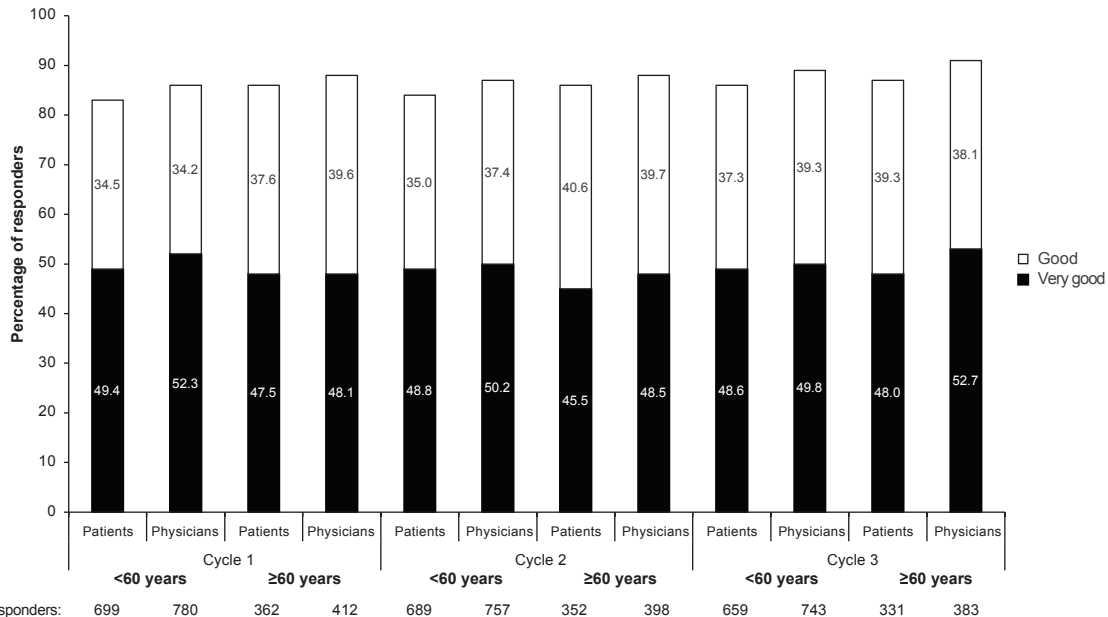

No. of responders: 699 780 362 412 689 757 352 398 659 743 331 383  
 NEPA, netupitant/palonosetron.
