# Supplementary material
Source: publisher figshare collection journal article supplement (https://karger.figshare.com/articles/dataset/_/14672223)
Supplement: Supplementary file 4 [file 1]

**Supplementary Figure 1.** Relative frequencies of patients with no influence on daily life activities due to nausea, vomiting, or the combined nausea and vomiting by age group.

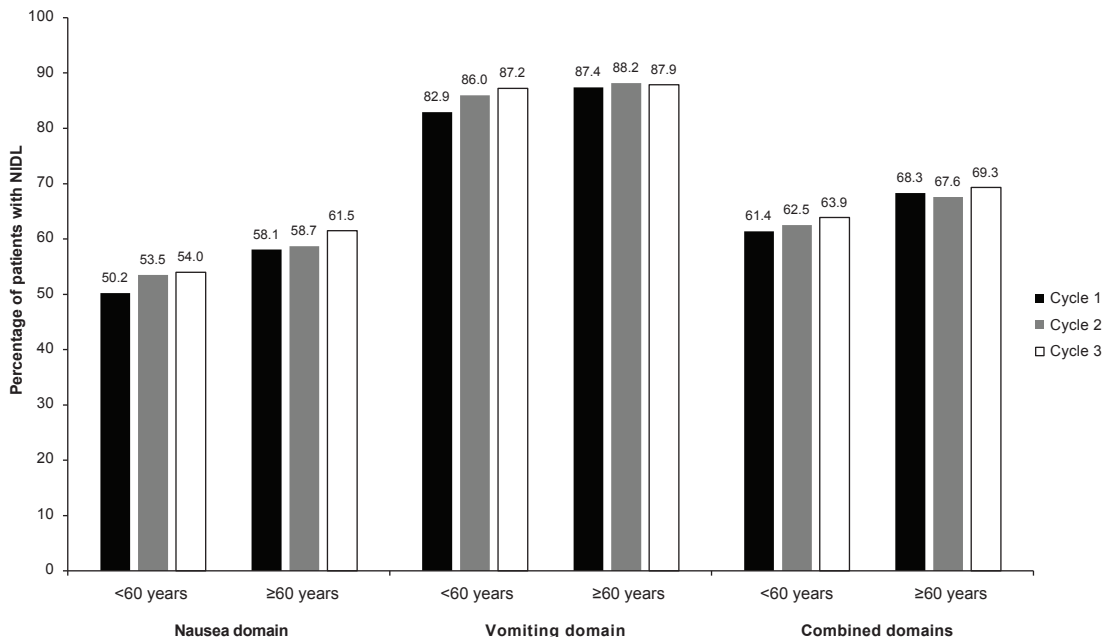

No. of evaluable patients: 337 356 347 207 199 198 556 573 560 311 299 283 412 416 410 243 229 223

NIDL, no impact in daily life.
