# Supplementary material
Source: publisher figshare collection journal article supplement (https://karger.figshare.com/articles/dataset/_/14672223)

**Supplementary Figure 4.** Perception of NEPA effectiveness by physicians and patients.

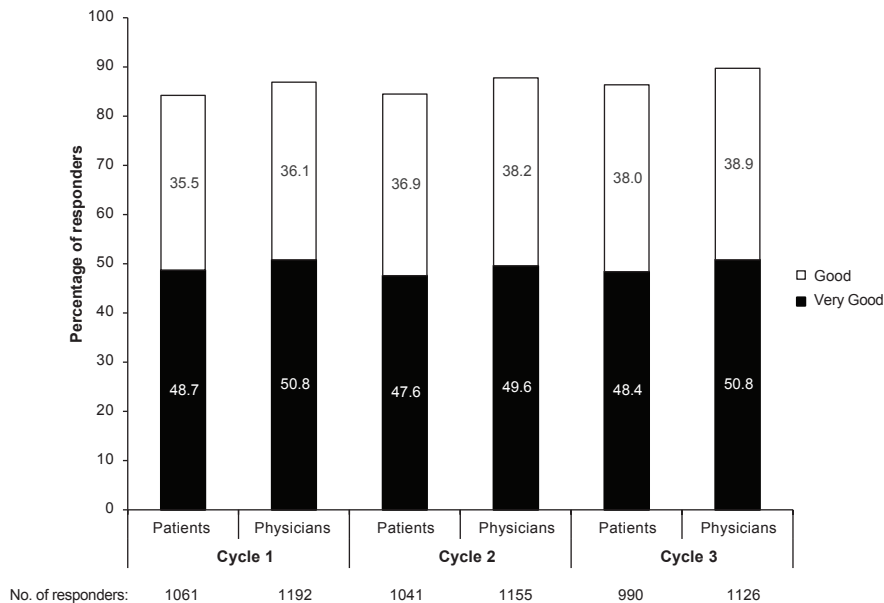

Supplement: Supplementary file 1 [file 1]
